# Supplementary material for: Identification of Immunogenic Cell-Death-Related Subtypes and Development of a Prognostic Signature in Gastric Cancer
Source: MDPI journal article supplement (doi:10.3390/biom13030528), 2023-03-14
Supplement: s1 [file s1]

1 **Supplementary Figures**

2 **Figure S1**

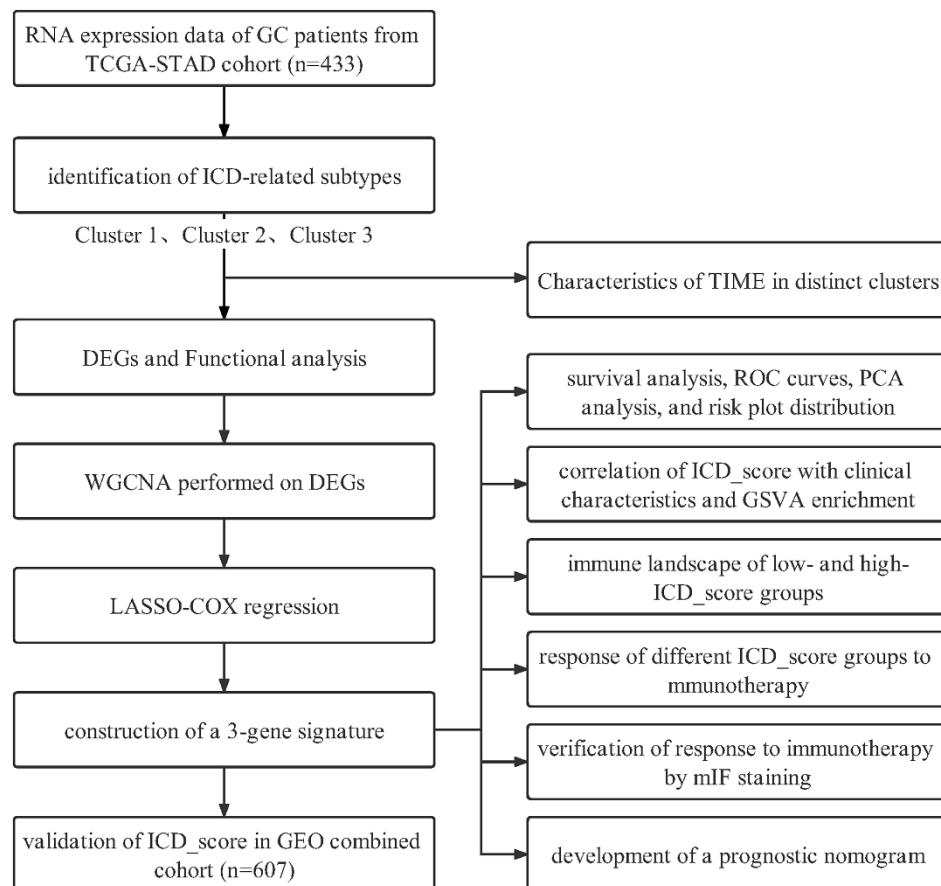

3

4 **Figure S1.** The entire analytical process of this study.

5

6

7

8

9

10 **Figure S2**

A

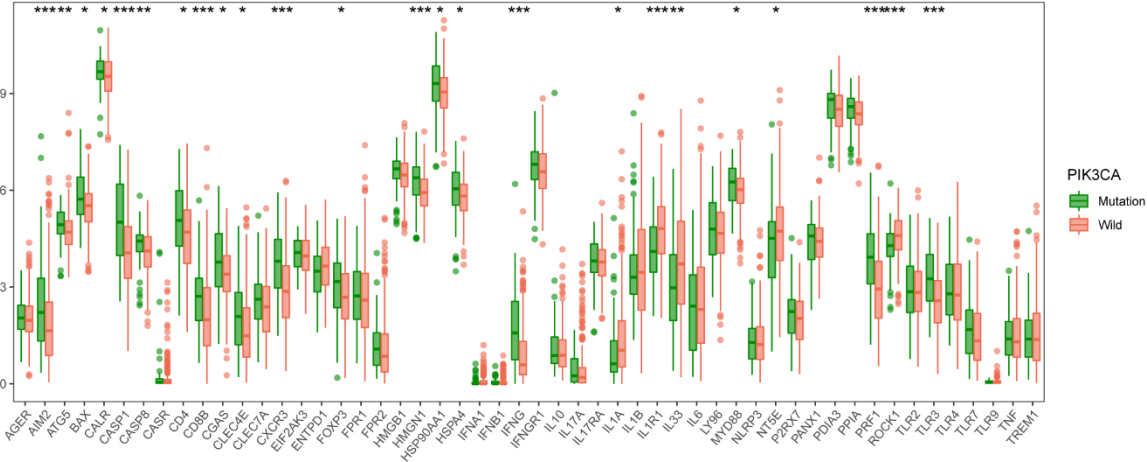

11

12 **Figure S2** The relationship between PIK3CA mutation and expression level of ICD-  
13 related genes in GC.

14 **Figure S3**

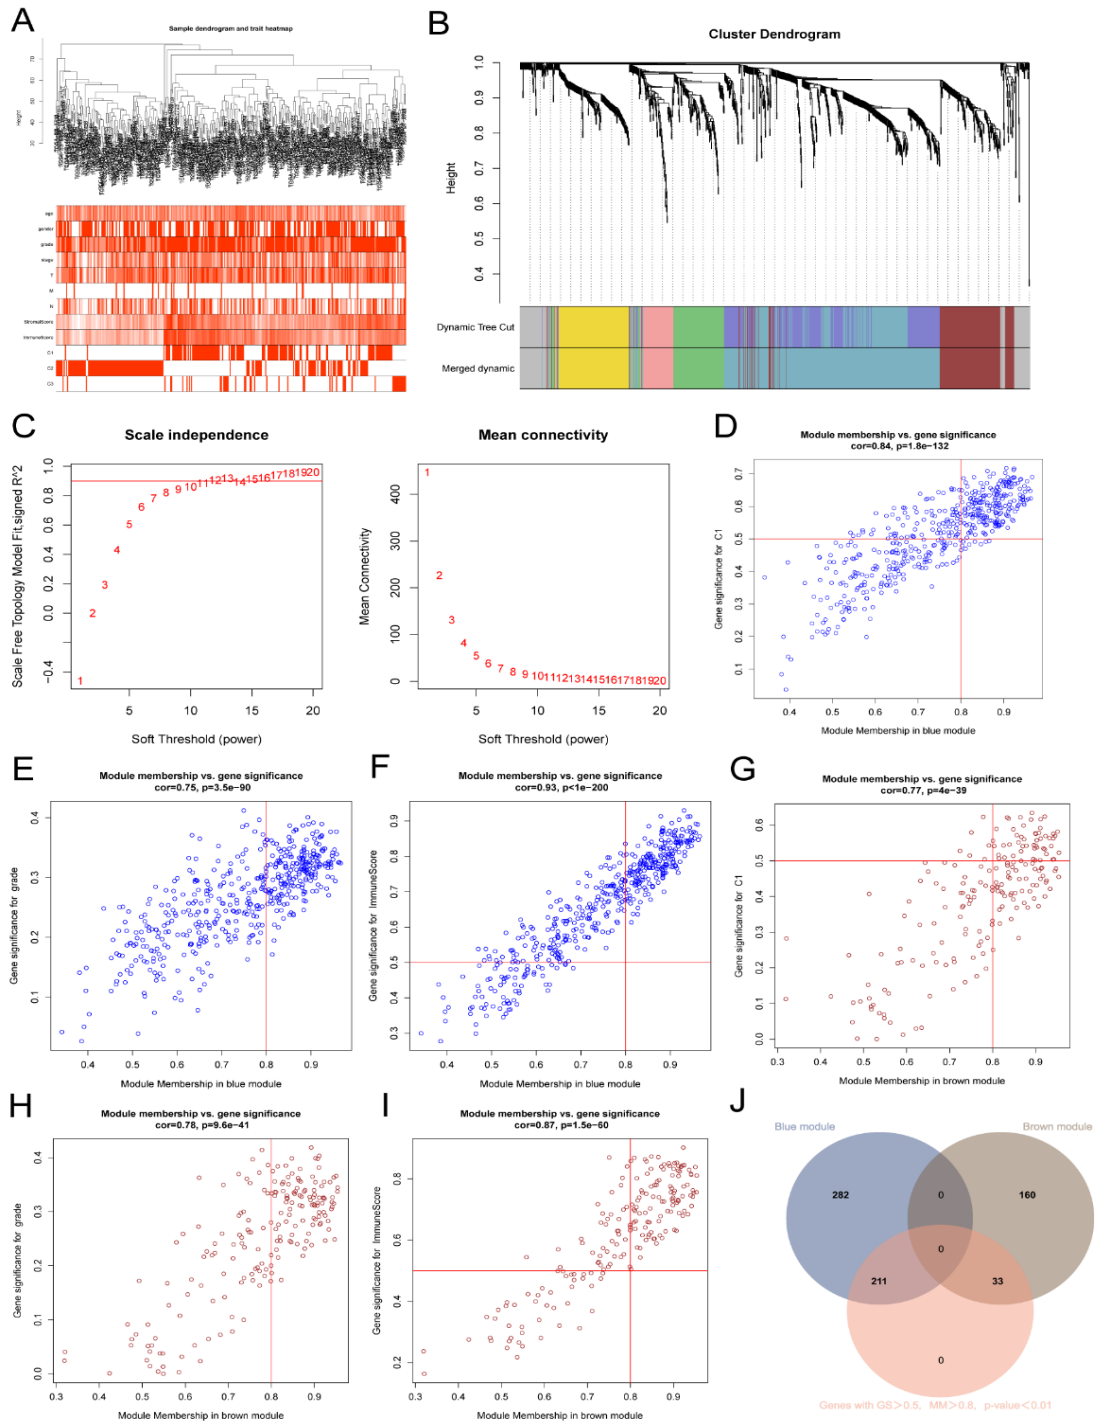

15

16 **Figure S3** Identification of the key module by WGCNA. (A) Clustering dendrogram  
 17 of GC samples and heatmap of clinical traits. The clustering was based on the  
 18 expression data of robust DEGs. The color intensity in heatmap increased with  
 19 clinical traits. In terms of survival status, white means alive and red means dead. (B)  
 20 Dendrogram of all candidate genes clustered based on a dissimilarity measure (1-  
 21 TOM) together with assigned module colors. (C) Analysis of the scale-free fit index

22 (left) and the mean connectivity (right) for various soft-thresholding power value. (D-  
23 F) Module membership vs. Gene Significance in blue module. (G-I) Module  
24 membership vs. Gene Significance in brown module. (J) Venn diagram showing the  
25 overlap hub genes between two hub modules (module blue and brown). Hub genes  
26 restriction:  $GS > 0.5$ ,  $MM > 0.8$ .

27

28 **Figure S4**

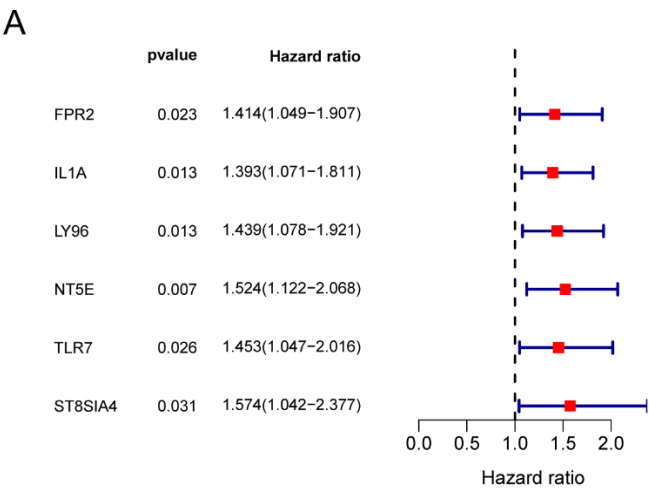

29

30 **Figure S4** Univariate analysis evaluates the prognostic value of the hub genes plus  
31 fifty-three ICD genes in terms of OS.

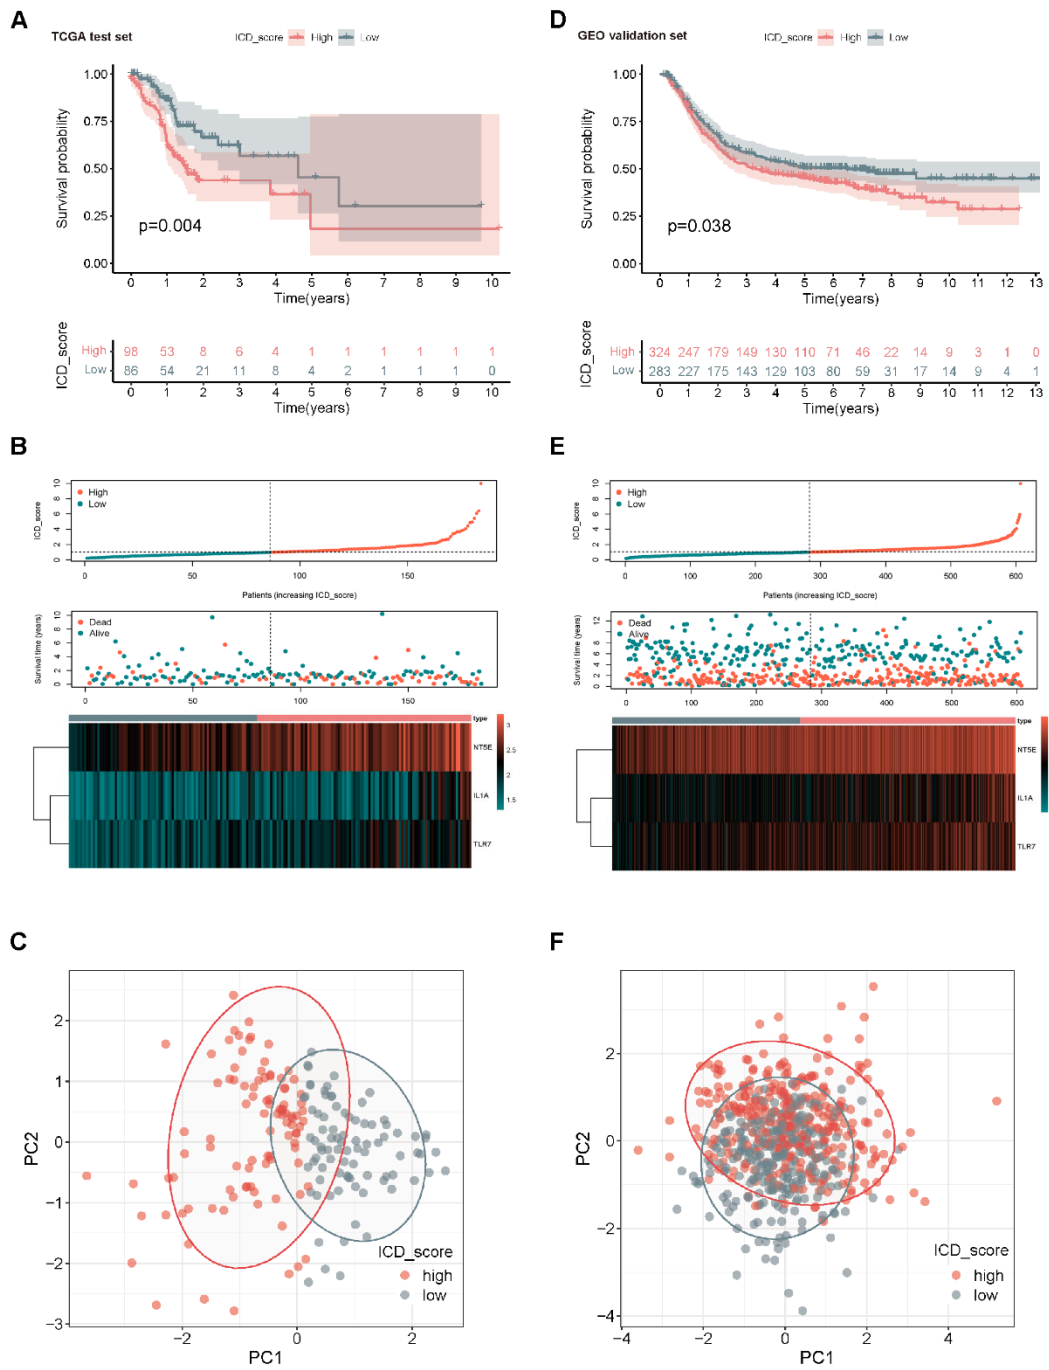

33

34 **Figure S5** Validation of ICD\_score in internal testing set and external validation set.  
35 (A) KM analysis of the OS between the two groups in testing set. (B) The ranked dot  
36 plot indicates the ICD\_score distribution and scatter plot presenting the patients'  
37 survival status in testing set. (C) The PCA analysis demonstrated that the patients in  
38 the different ICD\_score groups were distributed in two directions in testing set. (D-F)  
39 The same analysis was performed in external validation set and similar results were  
40 obtained.

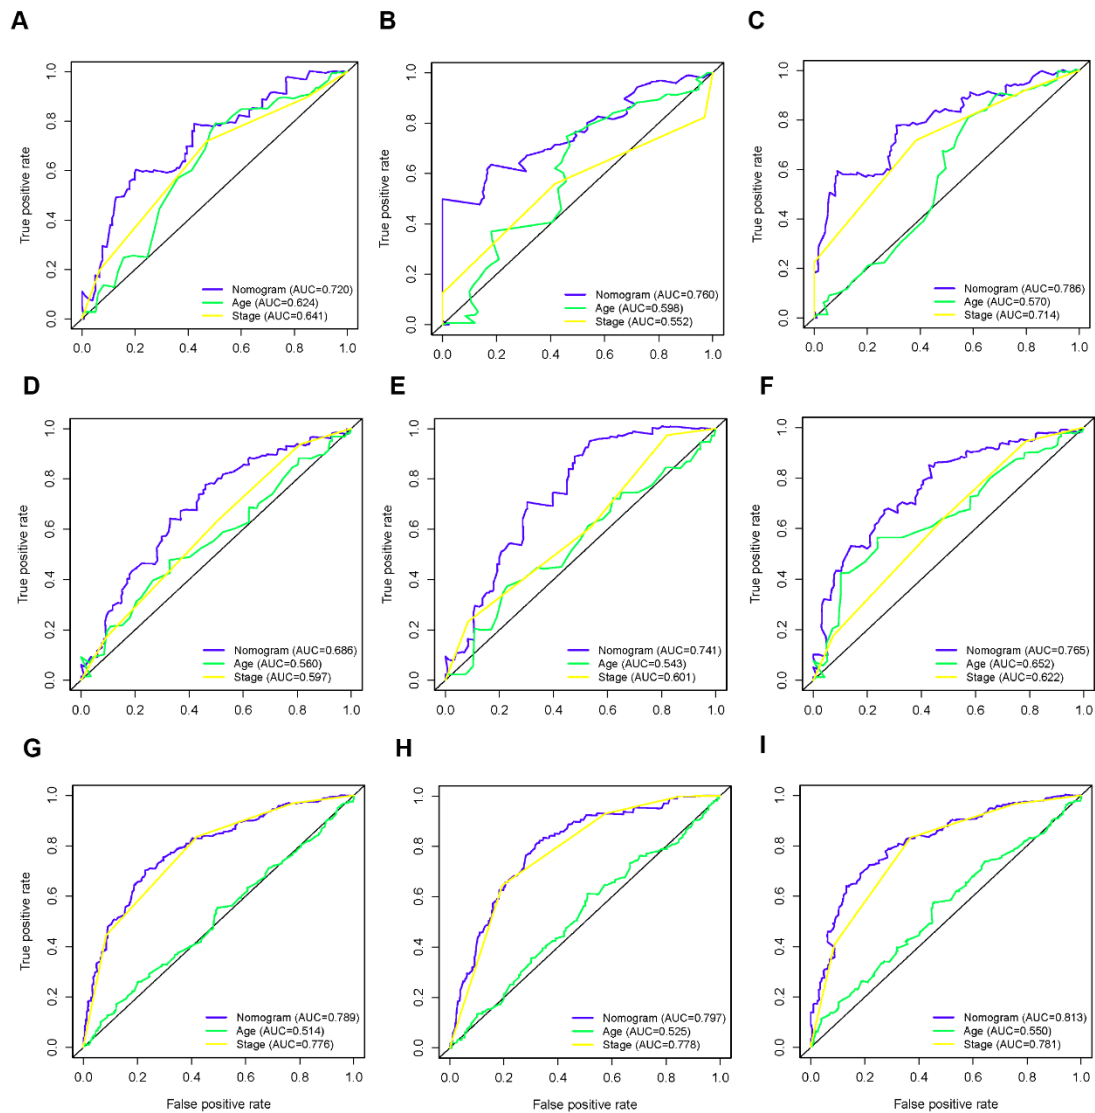

**Figure S6** Comparison of the AUCs of the nomogram and age or TNM staging system. (A-C) AUCs of the nomogram, age and TNM stage to predict overall survival at 1-year using the training set (A), internal testing set (B) and external validation set (C). (D-F) AUCs of the nomogram, age and TNM stage to predict overall survival at 3-year using the training set (D), internal testing set (E) and external validation set (F). (G-I) AUCs of the nomogram, age and TNM stage to predict overall survival at 5-year using the training set (G), internal testing set (H) and external validation set (I).
