# Supplementary material for: Identification of Immunogenic Cell-Death-Related Subtypes and Development of a Prognostic Signature in Gastric Cancer
Source: Biomolecules. 2023 Mar 14;13(3):528. doi: 10.3390/biom13030528 (PMC10046021; doi:10.3390/biom13030528)
Supplement: Supplementary file 1 [file biomolecules-13-00528-s001.zip › Supplementary_Tables.xlsx]

## Sheet: S1
Table S1: Summary of 53 recognized ICD-related genes
Genes	Type
ENTPD1	immunogenic cell death
NT5E	immunogenic cell death
CALR	immunogenic cell death
HMGB1	immunogenic cell death
HSP90AA1	immunogenic cell death
ATG5	immunogenic cell death
BAX	immunogenic cell death
CASP8	immunogenic cell death
PDIA3	immunogenic cell death
EIF2AK3	immunogenic cell death
PIK3CA	immunogenic cell death
CXCR3	immunogenic cell death
IFNA1	immunogenic cell death
IFNB1	immunogenic cell death
IL10	immunogenic cell death
IL6	immunogenic cell death
TNF	immunogenic cell death
CASP1	immunogenic cell death
IL1R1	immunogenic cell death
IL1B	immunogenic cell death
NLRP3	immunogenic cell death
P2RX7	immunogenic cell death
LY96	immunogenic cell death
MYD88	immunogenic cell death
TLR4	immunogenic cell death
CD4	immunogenic cell death
CD8B	immunogenic cell death
FOXP3	immunogenic cell death
IFNG	immunogenic cell death
IFNGR1	immunogenic cell death
IL17A	immunogenic cell death
IL17RA	immunogenic cell death
PRF1	immunogenic cell death
AGER	immunogenic cell death
AIM2	immunogenic cell death
CASR	immunogenic cell death
CGAS	immunogenic cell death
CLEC4E	immunogenic cell death
CLEC7A	immunogenic cell death
FPR1	immunogenic cell death
FPR2	immunogenic cell death
HMGN1	immunogenic cell death
HSPA4	immunogenic cell death
IL1A	immunogenic cell death
IL33	immunogenic cell death
PANX1	immunogenic cell death
PPIA	immunogenic cell death
ROCK1	immunogenic cell death
TLR2	immunogenic cell death
TLR3	immunogenic cell death
TLR7	immunogenic cell death
TLR9	immunogenic cell death
TREM1	immunogenic cell death

## Sheet: S2
Table S2: prognostic analysis of ICD_related genes
Genes	HR	HR.95L	HR.95H	P value	km
AGER	1.00785	0.757913	1.3402	0.95713	0.0466401
AIM2	0.965532	0.85756	1.0871	0.562104	0.247432
ATG5	1.0598	0.819685	1.37025	0.657708	0.0506725
BAX	0.922298	0.722507	1.17734	0.516104	0.0914267
CALR	0.977744	0.758675	1.26007	0.861945	0.388949
CASP1	0.963901	0.835009	1.11269	0.615661	0.0873025
CASP8	0.965789	0.741195	1.25844	0.796584	0.0557625
CASR	0.924365	0.668634	1.27791	0.634105	0.279955
CD4	1.07612	0.927861	1.24806	0.332058	0.100511
CD8B	1.01578	0.886466	1.16395	0.821726	0.0925873
CGAS	0.877856	0.723649	1.06492	0.186251	0.0199902
CLEC4E	1.04525	0.902315	1.21083	0.555265	0.109652
CLEC7A	1.09971	0.921694	1.31211	0.291455	0.0444199
CXCR3	0.964908	0.836215	1.11341	0.624768	0.0676766
EIF2AK3	0.984288	0.743805	1.30252	0.911773	0.441198
ENTPD1	1.15394	0.918875	1.44913	0.217956	0.020938
FOXP3	0.984294	0.832107	1.16431	0.853441	0.0917715
FPR1	1.11571	0.976253	1.27508	0.108017	0.0503627
FPR2	1.14744	0.97538	1.34984	0.0970718	0.0325035
HMGB1	0.85003	0.633295	1.14094	0.279266	0.0223676
HMGN1	0.995781	0.752919	1.31698	0.976354	0.225516
HSP90AA1	1.05513	0.843038	1.32058	0.639281	0.126986
HSPA4	1.06526	0.819456	1.38479	0.636703	0.0905596
IFNA1	0.82938	0.254781	2.69986	0.75606	0.417661
IFNB1	3.2148	0.980172	10.544	0.0539899	0.0520478
IFNG	0.949686	0.790229	1.14132	0.582002	0.139459
IFNGR1	0.981182	0.787045	1.22321	0.865892	0.118432
IL10	0.994217	0.811356	1.21829	0.955399	0.178808
IL17A	0.991858	0.74668	1.31754	0.955	0.0854896
IL17RA	0.83535	0.633955	1.10073	0.2012	0.0101027
IL1A	1.12773	0.99322	1.28045	0.0635991	0.00515947
IL1B	1.04963	0.954965	1.15369	0.31515	0.0129759
IL1R1	1.19706	1.01454	1.41241	0.0330893	0.017561
IL33	1.10819	0.999194	1.22907	0.0518108	0.00890285
IL6	1.09189	0.989413	1.20498	0.0804128	0.0100466
LY96	1.21203	1.02764	1.42951	0.0223848	0.00123371
MYD88	1.02148	0.78689	1.326	0.873171	0.175424
NLRP3	1.13462	0.925493	1.39101	0.22434	0.0408886
NT5E	1.23481	1.07692	1.41584	0.00251409	0.000405575
P2RX7	1.05585	0.859708	1.29673	0.604265	0.0740133
PANX1	1.04966	0.824528	1.33625	0.693981	0.0773295
PDIA3	1.0467	0.817702	1.33984	0.717093	0.157854
PIK3CA	1.11557	0.86914	1.43188	0.390483	0.0457056
PPIA	1.06905	0.79426	1.43891	0.659608	0.0755384
PRF1	0.965155	0.837507	1.11226	0.624124	0.174245
ROCK1	1.10869	0.859482	1.43016	0.427031	0.0392927
TLR2	1.15303	0.961929	1.38211	0.123525	0.0410937
TLR3	0.95241	0.803552	1.12884	0.5739	0.306369
TLR4	1.13752	0.970477	1.33331	0.111804	0.0116105
TLR7	1.22694	1.03151	1.4594	0.0208623	0.00111851
TLR9	0.957851	0.117395	7.8153	0.967928	0.0412757
TNF	0.897218	0.738531	1.09	0.274766	0.102829
TREM1	1.10673	0.950809	1.28821	0.190571	0.0272459

## Sheet: S3
Table S3: Clinical information of 443 gastric cancer patients
ID	Futime	Fustat	Age	Gender	Grade	Stage	T_category	M_category	N_category
TCGA-BR-8588	389	0	55	FEMALE	G3	II	T4	M0	N0
TCGA-VQ-A8DU	166	1	63	MALE	G2	III	T3	M0	N2
TCGA-HU-A4G9	736	0	67	FEMALE	G2	I	T1	M0	N0
TCGA-CD-A4MG	200	1	76	MALE	G3	II	T3	M0	N0
TCGA-HU-8602	679	0	58	FEMALE	G3	II	T4	M0	N0
TCGA-HU-A4GY	8	0	76	FEMALE	G3	III	T4	M0	N1
TCGA-BR-8365	533	1	70	FEMALE	G3	II	T3	M0	N0
TCGA-D7-5578	385	0	80	MALE	G3	III	T3	M0	N2
TCGA-BR-8682	500	0	52	MALE	G3	II	T4	M0	N0
TCGA-CG-4465	274	1	69	FEMALE	G3	IV	T4	M1	N3
TCGA-CG-5720	30	1	71	MALE	G3	I	T2	M0	N0
TCGA-D7-6524	543	0	53	MALE	G3	II	T2	M0	N1
TCGA-CD-A486	104	0	68	MALE	G2	II	T3	M0	N0
TCGA-CG-5716	0	0	86	MALE	G2	IV	T4	M1	N2
TCGA-RD-A7BT	262	1	66	MALE	G3	IV	T3	M0	N3
TCGA-IN-A7NT	323	0	73	FEMALE	G3	II	T3	M0	N1
TCGA-BR-8296	474	1	58	FEMALE	G3	III	T4	M0	N2
TCGA-VQ-A91K	1862	0	69	MALE	G2	III	T3	M0	N1
TCGA-MX-A5UJ	368	0	86	FEMALE	G3	III	T3	M0	N2
TCGA-BR-8286	394	0	49	MALE	G3	II	T3	M0	N0
TCGA-R5-A7ZF	259	1	65	FEMALE	G2	IV	T4	M1	N1
TCGA-VQ-A8E7	787	0	59	MALE	G2	IV	T3	M1	N1
TCGA-CG-4436	243	0	57	MALE	G2	I	T2	M0	N0
TCGA-D7-6520	573	0	53	MALE	G3	III	T2	M0	N2
TCGA-BR-4368	0	0	78	FEMALE	G3	IV	T4	M0	N2
TCGA-BR-8676	229	0	59	MALE	G3	III	T3	M0	N3
TCGA-BR-6457	356	0	69	MALE	G3	II	T3	M0	N0
TCGA-D7-A747	255	1	57	MALE	G3	II	T3	M0	N1
TCGA-BR-A44U	422	1	70	MALE	G3	III	T3	M0	N3
TCGA-KB-A93G	613	0	68	MALE	G1	I	T2	M0	N0
TCGA-BR-8367	418	0	55	MALE	G3	III	T3	M0	N3
TCGA-D7-A6F2	476	0	62	MALE	G3	I	T2	M0	N0
TCGA-BR-6454	0	0	58	MALE	G3	II	T3	M0	N0
TCGA-CG-4466	577	0	81	FEMALE	G2	I	T2	M0	N0
TCGA-CD-8524	388	0	61	FEMALE	G3	II	T3	M0	N0
TCGA-BR-7723	564	0	59	MALE	G3	III	T3	M0	N3
TCGA-VQ-A91X	289	1	74	MALE	G3	III	T3	M0	N2
TCGA-BR-6801	642	0	70	MALE	G2	II	T3	M0	N0
TCGA-IN-A6RN	594	0	72	FEMALE	G2	II	T1	M0	N2
TCGA-VQ-A928	174	1	49	MALE	G2	IV	T3	M0	N3
TCGA-BR-7958	388	0	60	MALE	G3	III	T4	M0	N0
TCGA-CG-4305	485	0	69	MALE	G3	II	T2	M0	N1
TCGA-CD-A48C	353	1	79	FEMALE	G3	II	T3	M0	N1
TCGA-HU-A4GX	616	0	70	FEMALE	G3	III	T4	M0	N2
TCGA-BR-8382	482	0	67	FEMALE	G3	III	T4	M0	N3
TCGA-IN-AB1V	479	0	63	MALE	G2	I	T1	M0	N0
TCGA-CD-8532	354	1	52	MALE	G2	II	T3	M0	N0
TCGA-IN-8663	103	1	68	MALE	G3	II	T2	M0	N2
TCGA-VQ-A91D	356	1	70	MALE	G2	III	T4	M0	N2
TCGA-KB-A6F7	1842	0	54	FEMALE	G3	I	T1	M0	N1
TCGA-VQ-A91V	974	0	58	MALE	G2	III	T3	M0	N2
TCGA-VQ-A8PM	57	1	56	MALE	G3	IV	T4	M0	N3
TCGA-CD-8529	374	0	65	MALE	G2	IV	T4	M1	N0
TCGA-CG-4460	669	1	66	FEMALE	G2	IV	T4	M1	N1
TCGA-BR-A4J9	14	0	55	MALE	G3	II	T3	M0	N0
TCGA-IN-A6RS	383	0	76	MALE	G2	I	T1	M0	N0
TCGA-D7-A6EZ	297	0	66	MALE	G3	III	T3	M0	N2
TCGA-BR-7717	552	1	63	MALE	G2	IV	T4	M0	N1
TCGA-CD-8527	218	1	72	FEMALE	G2	II	T2	M0	N1
TCGA-BR-6452	1055	0	78	FEMALE	G3	II	T3	M0	N0
TCGA-BR-8592	191	1	63	FEMALE	G3	III	T4	M0	N1
TCGA-D7-8573	593	0	57	MALE	G3	II	T3	M0	N0
TCGA-D7-A6F0	90	0	79	FEMALE	G3	I	T2	M0	N0
TCGA-D7-8570	752	0	44	MALE	G3	III	T3	M0	N3
TCGA-BR-6453	485	0	54	MALE	G3	II	T2	M0	N1
TCGA-HU-A4GP	273	0	62	FEMALE	G2	II	T2	M0	N1
TCGA-HU-A4H8	270	0	77	MALE	G2	I	T1	M0	N1
TCGA-VQ-A8E3	661	1	79	MALE	G3	II	T3	M0	N0
TCGA-KB-A93H	1145	0	79	FEMALE	G1	II	T3	M0	N1
TCGA-CG-4476	0	0	69	MALE	G3	III	T4	M0	N3
TCGA-HU-A4GF	785	0	69	MALE	G2	II	T3	M0	N0
TCGA-HU-A4GT	198	0	71	FEMALE	G3	II	T3	M0	N0
TCGA-VQ-A91A	873	0	67	MALE	G1	III	T3	M0	N3
TCGA-VQ-A8PX	1964	0	51	MALE	G2	I	T1	M0	N0
TCGA-IN-A7NR	198	0	64	FEMALE	G3	IV	T3	M1	N3
TCGA-HU-A4G8	544	0	71	FEMALE	G3	II	T3	M0	N1
TCGA-CG-5724	366	1	59	MALE	G3	IV	T3	M1	N3
TCGA-CD-5799	99	0	45	MALE	G3	II	T2	M0	N1
TCGA-HU-A4H0	64	0	72	MALE	G3	III	T4	M0	N3
TCGA-FP-A4BF	168	1	68	MALE	G3	III	T3	M0	N2
TCGA-BR-8380	21	0	55	MALE	G3	III	T4	M0	N3
TCGA-VQ-A91Q	633	1	61	MALE	G3	IV	T3	M0	N3
TCGA-FP-7829	594	0	69	MALE	G2	II	T3	M0	N1
TCGA-CG-4441	426	1	83	MALE	G2	III	T2	M0	N2
TCGA-BR-4279	291	1	43	MALE	G3	II	T2	M0	N1
TCGA-IN-A6RJ	379	0	64	MALE	G3	I	T1	M0	N0
TCGA-VQ-AA6J	642	0	75	MALE	G3	III	T4	M0	N2
TCGA-CD-5800	400	0	51	FEMALE	G1	II	T3	M0	N0
TCGA-CG-4442	0	0	85	MALE	G3	I	T2	M0	N0
TCGA-VQ-A8PQ	476	1	50	FEMALE	G2	IV	T4	M1	N1
TCGA-VQ-A8E0	562	1	68	MALE	G3	III	T3	M0	N2
TCGA-CD-5803	341	1	78	FEMALE	G3	II	T3	M0	N0
TCGA-BR-8371	359	1	62	MALE	G3	III	T3	M0	N3
TCGA-VQ-A8PU	820	0	72	FEMALE	G3	III	T4	M0	N1
TCGA-BR-8284	245	1	72	FEMALE	G3	III	T4	M0	N3
TCGA-VQ-A8PD	496	1	69	MALE	G2	III	T4	M0	N3
TCGA-VQ-A922	275	1	70	MALE	G2	IV	T4	M0	N1
TCGA-VQ-A8PB	1043	1	65	FEMALE	G2	II	T3	M0	N0
TCGA-FP-8210	153	1	48	MALE	G3	III	T3	M0	N1
TCGA-RD-A8N0	1236	0	53	FEMALE	G3	III	T3	M0	N2
TCGA-BR-8289	81	1	57	MALE	G3	IV	T4	M1	N3
TCGA-HU-A4GJ	650	0	60	FEMALE	G3	III	T4	M0	N3
TCGA-HU-A4H3	882	0	56	FEMALE	G3	III	T4	M0	N3
TCGA-BR-A4QL	352	0	75	FEMALE	G2	III	T3	M0	N3
TCGA-BR-7716	468	0	62	FEMALE	G2	II	T3	M0	N1
TCGA-HU-8608	641	0	70	MALE	G3	III	T4	M0	N2
TCGA-F1-A72C	346	0	68	MALE	G2	II	T3	M0	N0
TCGA-VQ-A8P3	988	0	72	MALE	G2	III	T4	M0	N1
TCGA-BR-7704	606	0	69	FEMALE	G3	II	T3	M0	N0
TCGA-VQ-A91N	570	1	59	FEMALE	G2	IV	T4	M0	N3
TCGA-CD-A4MH	371	0	86	FEMALE	G2	II	T3	M0	N0
TCGA-VQ-A91Y	296	1	67	MALE	G3	III	T4	M0	N3
TCGA-CG-4438	1645	0	56	MALE	G3	IV	T4	M0	N2
TCGA-BR-8690	325	0	54	FEMALE	G2	III	T3	M0	N3
TCGA-CG-4440	122	1	68	FEMALE	G3	IV	T3	M1	N3
TCGA-BR-6802	469	0	65	MALE	G3	III	T3	M0	N2
TCGA-VQ-A8E2	1072	0	57	MALE	G2	III	T3	M0	N2
TCGA-D7-6818	321	0	53	MALE	G3	III	T2	M0	N3
TCGA-RD-A8N9	1083	0	63	FEMALE	G3	II	T2	M0	N1
TCGA-D7-6525	406	1	58	MALE	G3	III	T2	M0	N2
TCGA-HU-A4G2	739	0	45	MALE	G3	II	T3	M0	N1
TCGA-SW-A7EB	176	0	45	MALE	G2	III	T3	M0	N2
TCGA-BR-7959	569	0	59	MALE	G3	III	T4	M0	N1
TCGA-CG-4301	92	0	75	FEMALE	G3	IV	T4	M1	N1
TCGA-BR-8060	348	1	75	FEMALE	G3	II	T2	M0	N2
TCGA-RD-A8MV	3720	0	56	MALE	G3	III	T3	M0	N2
TCGA-BR-8484	766	1	61	MALE	G2	III	T4	M0	N1
TCGA-HU-A4GC	99	0	74	MALE	G3	III	T4	M0	N2
TCGA-BR-6564	794	1	46	FEMALE	G3	III	T3	M0	N2
TCGA-HU-A4GU	200	0	73	MALE	G3	II	T3	M0	N1
TCGA-BR-8059	439	1	72	MALE	G3	III	T4	M0	N1
TCGA-CD-8528	375	0	43	FEMALE	G3	III	T4	M0	N0
TCGA-BR-6710	273	0	41	MALE	G2	I	T2	M0	N0
TCGA-D7-6526	523	0	67	FEMALE	G2	III	T3	M0	N2
TCGA-BR-8364	675	0	42	FEMALE	G3	III	T4	M0	N2
TCGA-KB-A93J	1124	0	78	MALE	G3	II	T2	M0	N1
TCGA-BR-8080	292	1	72	FEMALE	G3	III	T4	M0	N3
TCGA-IN-8462	572	0	80	MALE	G2	II	T2	M0	N1
TCGA-F1-6874	440	0	79	MALE	G3	I	T2	M0	N0
TCGA-CD-A487	284	0	51	MALE	G3	II	T3	M0	N1
TCGA-VQ-A91U	52	1	78	MALE	G2	III	T3	M0	N1
TCGA-VQ-A925	138	1	66	MALE	G2	III	T3	M0	N2
TCGA-BR-8372	583	0	63	MALE	G3	III	T4	M0	N3
TCGA-F1-6875	2197	1	79	MALE	G2	I	T2	M0	N0
TCGA-VQ-AA6D	521	0	52	FEMALE	G2	III	T4	M0	N1
TCGA-BR-8589	481	0	56	MALE	G3	III	T4	M0	N1
TCGA-CG-5734	243	1	68	MALE	G3	III	T3	M0	N1
TCGA-VQ-A924	1686	1	69	MALE	G2	II	T3	M0	N0
TCGA-BR-8683	300	1	75	MALE	G3	III	T4	M0	N2
TCGA-VQ-A8PK	543	1	58	MALE	G2	III	T3	M0	N3
TCGA-BR-A4J4	16	0	39	MALE	G3	III	T4	M0	N2
TCGA-R5-A7ZE	554	1	66	FEMALE	G2	III	T3	M0	N2
TCGA-D7-6522	566	0	58	MALE	G3	I	T2	M0	N0
TCGA-D7-6822	375	0	77	MALE	G2	I	T2	M0	N0
TCGA-BR-6803	397	0	54	FEMALE	G3	II	T3	M0	N0
TCGA-BR-8483	164	0	59	MALE	G2	III	T3	M0	N2
TCGA-BR-6563	1190	0	60	MALE	G3	II	T3	M0	N1
TCGA-BR-6705	421	0	68	FEMALE	G3	III	T3	M0	N3
TCGA-BR-8678	351	0	76	MALE	G2	I	T2	M0	N0
TCGA-BR-8680	481	0	45	MALE	G2	IV	T4	M1	N2
TCGA-CG-4462	0	1	72	FEMALE	G3	IV	T3	M1	N3
TCGA-RD-A8N5	1747	1	78	MALE	G2	III	T3	M0	N1
TCGA-BR-8295	67	1	60	FEMALE	G3	II	T4	M0	N0
TCGA-D7-8578	643	0	72	MALE	G2	I	T2	M0	N0
TCGA-R5-A7ZI	2267	0	44	FEMALE	G3	IV	T4	M1	N1
TCGA-FP-8209	1811	1	49	MALE	G3	I	T2	M0	N0
TCGA-HU-8610	23	0	75	MALE	G2	I	T1	M0	N0
TCGA-VQ-AA69	864	0	35	MALE	G2	III	T3	M0	N2
TCGA-CG-5723	2496	0	83	MALE	G3	II	T2	M0	N1
TCGA-RD-A8N2	3540	0	59	FEMALE	G3	I	T2	M0	N0
TCGA-BR-7722	466	1	62	MALE	G3	II	T3	M0	N1
TCGA-D7-8576	446	1	54	FEMALE	G3	III	T3	M0	N3
TCGA-BR-8058	532	0	53	FEMALE	G3	III	T4	M0	N2
TCGA-VQ-A91E	363	0	67	FEMALE	G3	III	T4	M0	N0
TCGA-VQ-A8PO	282	1	74	MALE	G3	II	T4	M0	N0
TCGA-CG-4444	1431	0	76	MALE	G3	III	T2	M0	N2
TCGA-CD-5798	86	0	82	MALE	G2	II	T3	M0	N0
TCGA-BR-7851	378	0	74	MALE	G3	II	T4	M0	N0
TCGA-BR-8591	409	0	79	MALE	G3	III	T4	M0	N3
TCGA-D7-A6EV	342	0	71	FEMALE	G3	II	T2	M0	N2
TCGA-R5-A805	281	1	71	MALE	G3	III	T3	M0	N2
TCGA-VQ-A8P2	848	0	68	MALE	G2	III	T4	M0	N1
TCGA-BR-8687	250	1	67	FEMALE	G3	III	T4	M0	N2
TCGA-MX-A5UG	113	1	78	MALE	G3	III	T3	M0	N1
TCGA-VQ-A94U	672	0	70	MALE	G3	II	T4	M0	N0
TCGA-D7-A4Z0	449	0	60	FEMALE	G3	II	T2	M0	N2
TCGA-BR-8590	284	1	62	MALE	G3	III	T4	M0	N2
TCGA-BR-6565	279	1	67	MALE	G2	II	T4	M0	N0
TCGA-VQ-A923	0	1	90	MALE	G3	III	T3	M0	N1
TCGA-D7-A4YU	500	0	73	MALE	G3	III	T3	M0	N3
TCGA-VQ-AA6K	378	1	59	MALE	G3	III	T4	M0	N3
TCGA-BR-8679	0	0	63	FEMALE	G2	I	T2	M0	N0
TCGA-F1-A448	501	0	70	MALE	G3	III	T3	M0	N3
TCGA-CD-8535	390	0	59	MALE	G3	III	T3	M0	N1
TCGA-D7-8574	523	0	72	MALE	G3	III	T2	M0	N3
TCGA-D7-5577	376	0	53	FEMALE	G2	III	T2	M0	N3
TCGA-CG-5722	30	0	67	FEMALE	G3	IV	T3	M1	N2
TCGA-CG-5726	881	1	73	MALE	G2	I	T1	M0	N0
TCGA-D7-A748	132	1	41	FEMALE	G3	IV	T4	M1	N3
TCGA-BR-8373	450	0	65	FEMALE	G2	III	T4	M0	N1
TCGA-BR-6852	423	0	64	FEMALE	G3	II	T3	M0	N0
TCGA-BR-6458	213	0	57	FEMALE	G3	II	T3	M0	N1
TCGA-BR-7196	390	0	64	MALE	G3	IV	T3	M1	N3
TCGA-IN-A6RI	559	0	45	MALE	G2	I	T1	M0	N0
TCGA-HU-A4GQ	3	1	71	MALE	G2	III	T4	M0	N2
TCGA-B7-5818	356	0	62	MALE	G3	I	T2	M0	N0
TCGA-BR-A4J6	20	0	69	FEMALE	G2	II	T3	M0	N0
TCGA-CG-4443	912	0	68	MALE	G2	I	T1	M0	N0
TCGA-CG-5718	1095	1	78	FEMALE	G2	II	T2	M0	N1
TCGA-BR-6455	399	0	59	MALE	G3	II	T3	M0	N1
TCGA-VQ-A8P5	235	1	67	MALE	G3	II	T3	M0	N0
TCGA-BR-A4PF	35	0	72	MALE	G3	III	T4	M0	N2
TCGA-HU-8249	881	0	76	MALE	G2	III	T3	M0	N2
TCGA-CG-5725	457	1	72	MALE	G3	I	T2	M0	N0
TCGA-HU-A4H4	725	0	53	FEMALE	G3	II	T2	M0	N2
TCGA-BR-6709	370	1	57	FEMALE	G3	III	T3	M0	N3
TCGA-BR-A44T	382	0	53	FEMALE	G3	II	T3	M0	N0
TCGA-CD-5813	377	1	60	MALE	G3	II	T3	M0	N0
TCGA-VQ-AA64	560	1	68	MALE	G2	III	T3	M0	N2
TCGA-CG-5717	212	1	58	MALE	G3	II	T2	M0	N1
TCGA-BR-A4J8	411	0	71	FEMALE	G3	III	T3	M0	N3
TCGA-CG-5732	2100	1	66	MALE	G2	IV	T2	M0	N3
TCGA-CG-4477	942	0	58	FEMALE	G3	I	T2	M0	N0
TCGA-HU-A4G3	170	0	54	MALE	G2	II	T2	M0	N2
TCGA-IN-AB1X	411	0	78	FEMALE	G3	II	T3	M0	N0
TCGA-CG-5721	183	0	58	MALE	G3	IV	T4	M0	N1
TCGA-CD-A489	344	1	58	MALE	G3	II	T3	M0	N0
TCGA-RD-A8N4	2171	0	58	FEMALE	G3	III	T3	M0	N1
TCGA-BR-6566	378	0	64	FEMALE	G3	II	T3	M0	N0
TCGA-HU-8244	742	0	77	FEMALE	G1	I	T1	M0	N0
TCGA-RD-A8N1	3519	0	70	MALE	G3	III	T3	M0	N2
TCGA-VQ-A8DT	1484	0	43	MALE	G3	III	T3	M0	N3
TCGA-BR-8487	34	0	64	FEMALE	G3	II	T3	M0	N0
TCGA-CD-8526	381	0	73	FEMALE	G3	III	T3	M0	N1
TCGA-HU-A4H6	476	0	72	FEMALE	G2	III	T3	M0	N2
TCGA-RD-A8N6	272	1	78	FEMALE	G3	III	T2	M0	N2
TCGA-D7-A4YX	461	0	63	MALE	G3	II	T3	M0	N1
TCGA-BR-A4CS	45	1	77	MALE	G3	III	T4	M0	N3
TCGA-B7-A5TI	595	0	52	MALE	G3	III	T4	M0	N3
TCGA-BR-4280	201	1	78	FEMALE	G2	III	T2	M0	N1
TCGA-D7-8572	511	0	57	MALE	G2	II	T2	M0	N2
TCGA-BR-8366	29	0	80	FEMALE	G3	II	T3	M0	N0
TCGA-CD-A48A	378	0	57	MALE	G2	II	T3	M0	N0
TCGA-VQ-A8PC	1407	1	65	MALE	G3	III	T3	M0	N1
TCGA-D7-6528	463	0	70	FEMALE	G2	I	T2	M0	N0
TCGA-BR-6707	605	1	75	MALE	G3	II	T3	M0	N0
TCGA-BR-8368	131	0	84	FEMALE	G3	I	T2	M0	N0
TCGA-HU-A4HD	1016	0	73	MALE	G2	III	T3	M0	N2
TCGA-BR-8369	427	0	76	FEMALE	G3	III	T3	M0	N3
TCGA-BR-4267	188	1	51	MALE	G2	I	T2	M0	N0
TCGA-R5-A7O7	1389	0	51	MALE	G2	IV	T3	M1	N1
TCGA-RD-A7BS	336	1	46	MALE	G3	III	T3	M0	N1
TCGA-BR-A4J5	390	0	56	MALE	G3	III	T4	M0	N1
TCGA-VQ-AA6F	1646	0	57	MALE	G2	II	T3	M0	N1
TCGA-D7-8575	554	1	75	MALE	G3	III	T3	M0	N2
TCGA-BR-8077	21	0	58	FEMALE	G2	III	T4	M0	N1
TCGA-CD-8531	383	0	66	FEMALE	G3	III	T3	M0	N1
TCGA-IN-7806	645	0	50	MALE	G3	II	T3	M0	N1
TCGA-BR-8485	280	0	68	FEMALE	G3	III	T4	M0	N3
TCGA-BR-4361	0	0	66	FEMALE	G3	III	T4	M0	N0
TCGA-IN-A7NU	356	0	69	MALE	G3	III	T3	M0	N3
TCGA-RD-A7BW	156	1	68	FEMALE	G3	I	T2	M0	N0
TCGA-D7-8579	636	0	66	FEMALE	G2	II	T2	M0	N2
TCGA-BR-8486	0	0	90	FEMALE	G2	I	T1	M0	N0
TCGA-VQ-AA68	1219	0	52	FEMALE	G2	III	T4	M0	N3
TCGA-BR-8677	370	0	74	FEMALE	G3	III	T3	M0	N3
TCGA-HU-A4HB	477	1	68	MALE	G3	II	T2	M0	N2
TCGA-BR-7707	385	0	69	FEMALE	G3	I	T2	M0	N0
TCGA-VQ-A8P8	881	0	72	FEMALE	G2	II	T4	M0	N0
TCGA-BR-8384	113	0	69	MALE	G3	III	T4	M0	N2
TCGA-VQ-A92D	1752	0	67	MALE	G2	I	T2	M0	N0
TCGA-HU-A4H2	394	0	58	FEMALE	G2	III	T3	M0	N3
TCGA-BR-8361	593	0	71	FEMALE	G3	III	T4	M0	N2
TCGA-VQ-A91Z	1589	0	67	FEMALE	G2	III	T3	M0	N1
TCGA-D7-6527	312	1	62	MALE	G2	II	T2	M0	N1
TCGA-RD-A8MW	1153	1	72	MALE	G3	III	T3	M0	N2
TCGA-D7-A6EX	344	0	72	FEMALE	G3	III	T3	M0	N2
TCGA-VQ-A927	200	1	81	MALE	G1	III	T3	M0	N3
TCGA-CG-4475	699	0	76	MALE	G3	II	T3	M0	N1
TCGA-CD-5801	401	1	69	MALE	G3	III	T3	M0	N1
TCGA-VQ-A8PP	712	1	76	MALE	G2	IV	T4	M0	N1
TCGA-RD-A7C1	507	1	82	MALE	G3	I	T2	M0	N0
TCGA-HU-8604	694	0	82	FEMALE	G2	II	T3	M0	N0
TCGA-BR-6456	308	0	74	FEMALE	G2	II	T3	M0	N1
TCGA-BR-A4CR	0	0	70	FEMALE	G3	III	T4	M0	N3
TCGA-BR-7901	105	1	74	MALE	G2	II	T3	M0	N1
TCGA-MX-A663	300	1	66	MALE	G3	II	T3	M0	N0
TCGA-VQ-A8PF	76	1	76	MALE	G3	III	T3	M0	N3
TCGA-BR-7715	469	0	65	MALE	G2	II	T3	M0	N0
TCGA-D7-A74A	225	0	61	FEMALE	G2	III	T3	M0	N2
TCGA-BR-4253	124	1	80	FEMALE	G3	III	T3	M0	N1
TCGA-BR-8381	224	0	51	MALE	G3	II	T3	M0	N1
TCGA-VQ-A8DZ	396	1	70	MALE	G3	IV	T4	M1	N3
TCGA-HU-A4GD	692	0	56	MALE	G3	II	T3	M0	N1
TCGA-VQ-A8DV	403	1	48	MALE	G2	I	T2	M0	N0
TCGA-CG-4306	1	1	90	MALE	G3	IV	T3	M1	N2
TCGA-VQ-A8PH	389	1	62	MALE	G2	III	T3	M0	N3
TCGA-VQ-AA6A	1002	0	56	MALE	G2	III	T4	M0	N3
TCGA-BR-8081	625	0	71	FEMALE	G2	II	T4	M0	N0
TCGA-VQ-AA6G	792	1	68	MALE	G2	II	T3	M0	N0
TCGA-BR-8686	477	0	69	MALE	G3	III	T4	M0	N1
TCGA-VQ-A94O	640	1	74	MALE	G2	III	T4	M0	N3
TCGA-D7-A6EY	348	1	72	FEMALE	G3	III	T3	M0	N3
TCGA-HU-A4GH	358	0	75	MALE	G2	I	T1	M0	N0
TCGA-CG-4437	245	0	83	MALE	G2	II	T2	M0	N1
TCGA-D7-6815	486	0	70	FEMALE	G2	II	T2	M0	N2
TCGA-CD-8525	383	0	82	FEMALE	G3	III	T3	M0	N1
TCGA-CG-5719	31	0	54	FEMALE	G1	IV	T4	M1	N0
TCGA-RD-A8NB	513	1	80	FEMALE	G3	III	T3	M0	N1
TCGA-BR-A4IV	411	0	47	MALE	G3	III	T4	M0	N2
TCGA-HF-A5NB	928	0	75	FEMALE	G3	III	T4	M0	N3
TCGA-VQ-A94T	342	1	73	MALE	G3	III	T3	M0	N2
TCGA-CD-8533	468	0	48	MALE	G3	II	T3	M0	N0
TCGA-CD-8530	377	0	51	MALE	G3	II	T3	M0	N0
TCGA-CG-4469	215	1	70	MALE	G3	IV	T3	M0	N3
TCGA-VQ-A8PE	675	1	78	MALE	G3	III	T3	M0	N3
TCGA-CD-8534	367	0	41	MALE	G3	II	T3	M0	N0

## Sheet: S4
Table S4: Basic information of gastric cancer datasets included in the current study
Accession_number /Source	Platform	Number_of_patients	Number_of_patients_with_OS>1_months	Survival_data
GEO: GSE15459	GPL570	200	182	OS
GEO: GSE34942	GPL570	56	55	OS
GEO: GSE57303	GPL570	70	70	OS
GEO: GSE62254(ACRG)	GPL570	300	300	OS
TCGA-STAD	RNAseq	375	375	OS
PKUCH1	Agilent human mRNA & lncRNA Array 4.0 platform	198	195	OS
PKUCH2	RNAseq	35	-	-
IMvigor210	RNAseq	348	0	OS
GEO: Gene Expression Omnibus

## Sheet: S5
Table S5: Identification of biological process on hub genes by clueGO
ID	Term	Term PValue	% Associated Genes
GO:0032732	positive regulation of interleukin-1 production	1.14969e-16	21.9512
GO:0032731	positive regulation of interleukin-1 beta production	1.81075e-15	23.5294
GO:0032653	regulation of interleukin-10 production	3.31369e-17	26.1538
GO:0032733	positive regulation of interleukin-10 production	1.82883e-11	25.5814
GO:0032663	regulation of interleukin-2 production	1.16945e-11	19.403
GO:0032743	positive regulation of interleukin-2 production	8.46804e-11	27.027
GO:0050671	positive regulation of lymphocyte proliferation	8.35027e-23	18.0645
GO:0042102	positive regulation of T cell proliferation	1.47389e-21	21.4286
GO:0032649	regulation of interferon-gamma production	1.60634e-24	22.1311
GO:0032689	negative regulation of interferon-gamma production	4.31769e-10	23.2558
GO:0032729	positive regulation of interferon-gamma production	4.1463e-18	23.4568
GO:0032642	regulation of chemokine production	3.44538e-16	18.8119
GO:0032655	regulation of interleukin-12 production	1.30812e-21	30.7692
GO:0032735	positive regulation of interleukin-12 production	9.97405e-16	31.8182
GO:0002269	leukocyte activation involved in inflammatory response	2.69854e-13	25.4902
GO:0061900	glial cell activation	1.00393e-12	23.2143
GO:0032642	regulation of chemokine production	3.44538e-16	18.8119
GO:0032735	positive regulation of interleukin-12 production	9.97405e-16	31.8182
GO:0032760	positive regulation of tumor necrosis factor production	2.31021e-21	21.0526
GO:0002367	cytokine production involved in immune response	2.34228e-23	20.1493
GO:0001913	T cell mediated cytotoxicity	4.00761e-10	19.6429
GO:0002456	T cell mediated immunity	8.35015e-22	20.3252
GO:0002718	regulation of cytokine production involved in immune response	2.34228e-23	20.1493
GO:0002369	T cell cytokine production	3.35611e-10	23.8095
GO:0002720	positive regulation of cytokine production involved in immune response	1.19919e-14	18.8889
GO:0002709	regulation of T cell mediated immunity	6.7391e-17	20.4301
GO:0002724	regulation of T cell cytokine production	3.35611e-10	23.8095
GO:0002711	positive regulation of T cell mediated immunity	6.18548e-11	19.6721
